# Supplementary material for: Formation mechanisms of voids and pin-holes in CuSbS2 thin film synthesized by sulfurizing a co-sputtered Cu–Sb precursor
Source: Royal Society of Chemistry journal article supplement (doi:10.1039/d2ta00208f), 2022-01-01
Supplement: d2ta00208f1.pdf [file d2ta00208f1.pdf]

## **Formation Mechanism of Voids and Pin-holes in CuSbS<sub>2</sub> Thin Film via Sulfurizing Co-sputtered Cu-Sb Precursor**

Yuanfang Zhang, Jialiang Huang\*, Pengfei Zhang, Jialin Cong, Jianjun Li and Xiaojing Hao\*

Australian Centre for Advanced Photovoltaics, School of Photovoltaic and Renewable Energy  
Engineering, University of New South Wales, Sydney, NSW 2052, Australia

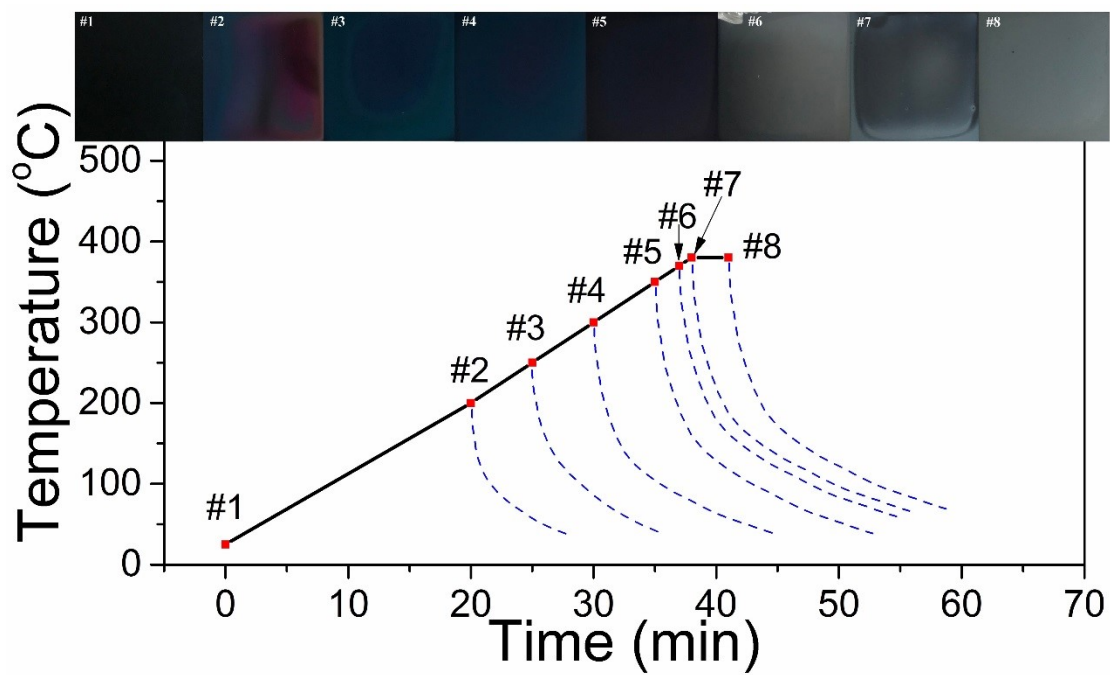

Fig S1 Temperature profiling of sulfurization process and photographs of samples as indicated on temperature profiling.

Table S1 Summary of phase evolution of Cu-Sb co-sputtering precursor after being sulfurized at a series of temperatures and times.

| <b>Samples</b> | <b>Compositions</b>            | <b>PDF Cards #</b> |
|----------------|--------------------------------|--------------------|
| Precursor      | Cu                             | 01-070-3038        |
|                | Cu <sub>2</sub> Sb             | 01-085-0492        |
|                | Sb                             | 01-085-1322        |
| 200 °C         | Cu                             | 01-070-3038        |
|                | Cu <sub>2</sub> S              | 00-002-1284        |
|                | Cu <sub>2</sub> Sb             | 01-085-0492        |
|                | Sb                             | 01-085-1322        |
| 250 °C         | CuS                            | 00-024-0060        |
|                | Sb                             | 01-085-1322        |
| 300 °C         | CuS                            | 00-024-0060        |
|                | Sb <sub>2</sub> S <sub>3</sub> | 01-075-1310        |
|                | Sb                             | 01-085-1322        |
| 350 °C         | CuS                            | 00-024-0060        |
|                | Sb <sub>2</sub> S <sub>3</sub> | 01-075-1310        |
|                | Sb                             | 01-085-1322        |
| 370 °C         | CuS                            | 00-024-0060        |
|                | CuSbS <sub>2</sub>             | 03-065-2416        |
|                | Sb <sub>2</sub> S <sub>3</sub> | 01-075-1310        |
| 380 °C         | CuSbS <sub>2</sub>             | 03-065-2416        |
|                | Sb <sub>2</sub> S <sub>3</sub> | 01-075-1310        |
| 380 °C-3min    | CuSbS <sub>2</sub>             | 03-065-2416        |
|                | Sb <sub>2</sub> S <sub>3</sub> | 01-075-1310        |

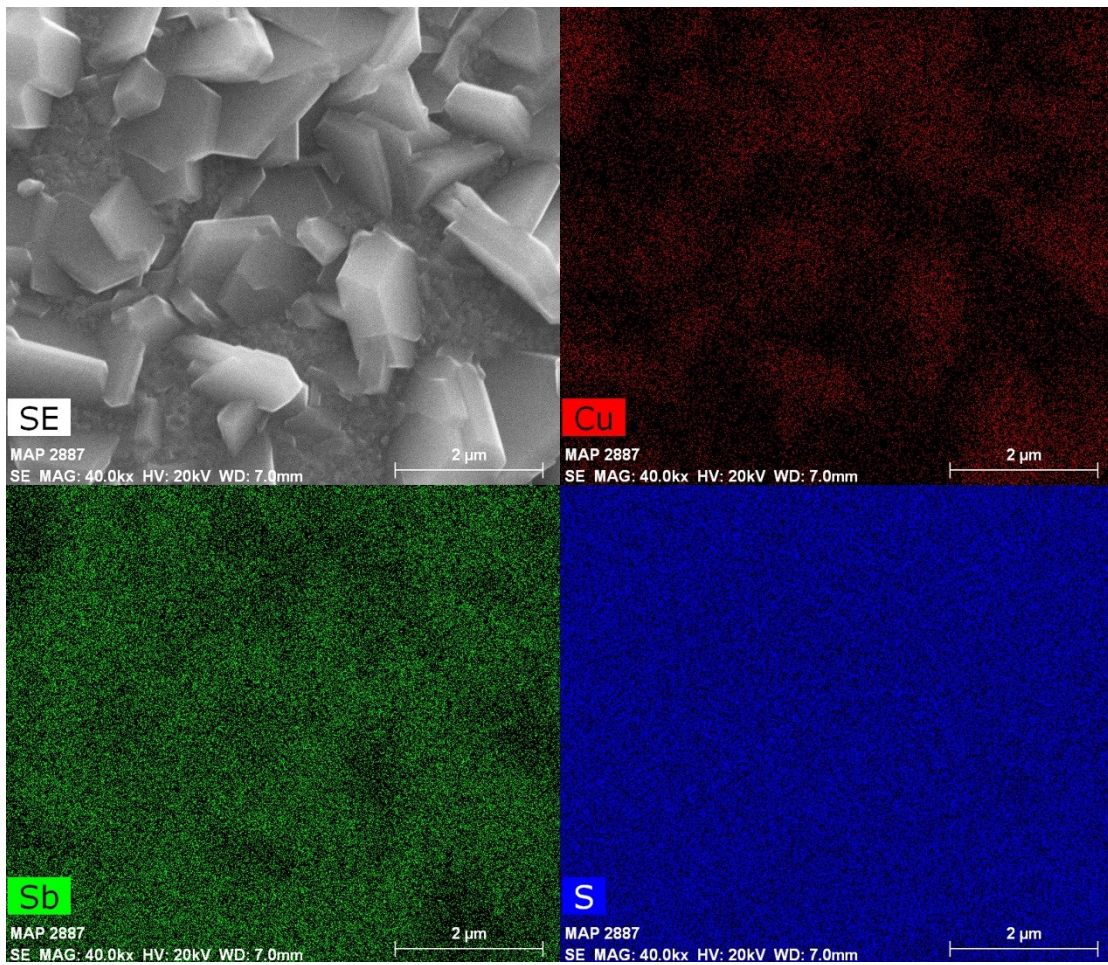

Fig S2 SEM and corresponding EDS mapping images of Cu-Sb precursor after sulfurization treatment at 350 °C followed by rapid cooling.

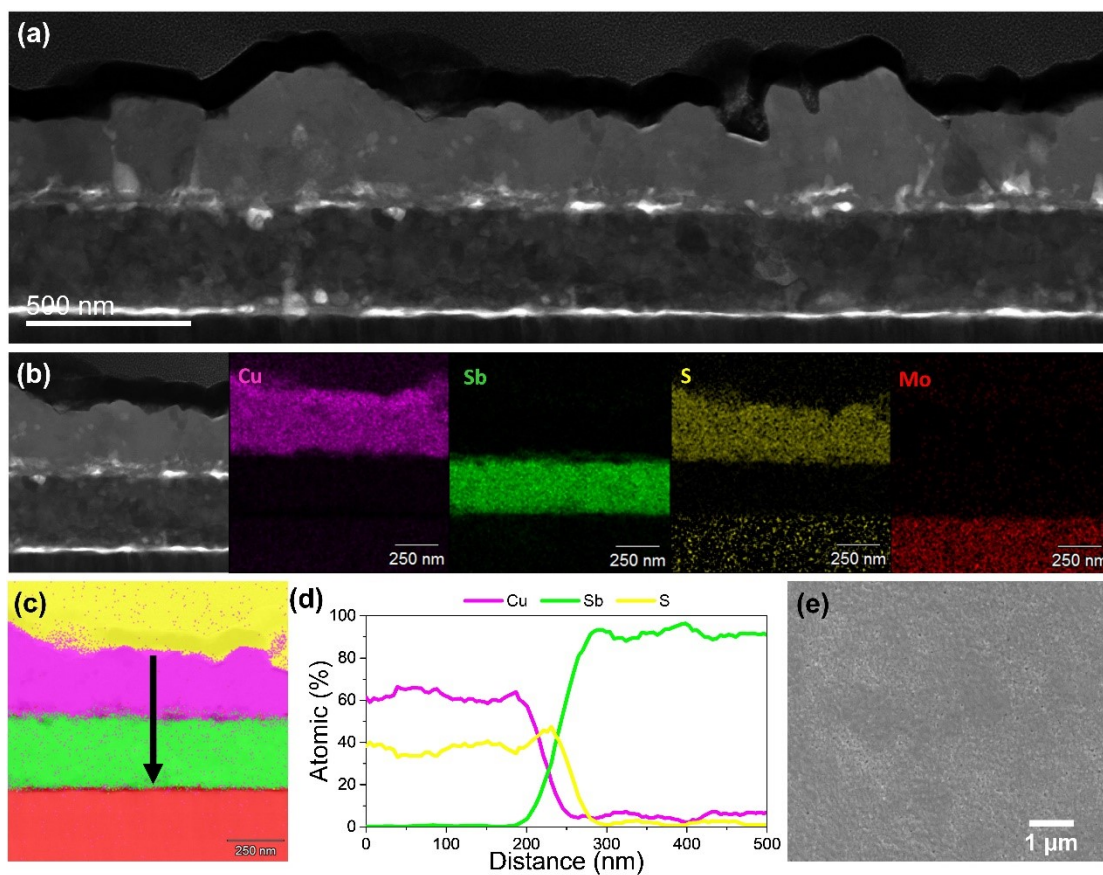

Fig S3 Microscopy analysis of Cu-Sb precursor after sulfurization treatment at 250 °C followed by rapid cooling, (a) cross-section TEM image, (b) STEM-EDS mapping, (c) phases mapping, (d) STEM-EDS line scan as arrow marked in (c), (e) SEM image of exfoliated backside surface.

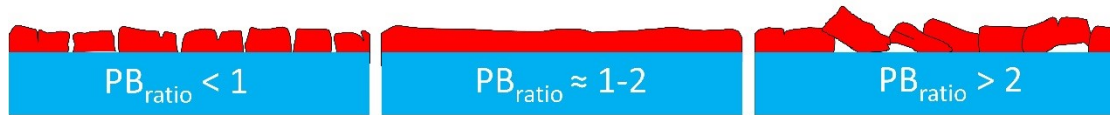

Fig. S4 Schematic diagram of the thin film morphology and the corresponding Pillings-Bedworth ratio.

For a general solid reaction,

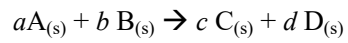

the  $PB_{\text{ratio}}$  can then be expressed as

$$PB_{\text{ratio}} = \frac{\sum_i v_i [M_i / \rho_i]_{\text{product}}}{\sum_i v_i [M_i / \rho_i]_{\text{reactant}}}$$

where  $i$  denotes the compound,  $v_i$  is the stoichiometric coefficient of  $i$ ,  $M_i$  represents the molar mass of  $i$  in (g/mol), and  $\rho_i$  is the density of  $i$  in (g/cm<sup>3</sup>).

Table S2 Densities and molar masses for the various elements and compounds, as well as the Pillings-Bedworth ratios calculated for the given reactions.

|                                | $\rho$ (g/cm <sup>3</sup> ) | M (g/mol) | Reaction                                                                               | PB-ratio |
|--------------------------------|-----------------------------|-----------|----------------------------------------------------------------------------------------|----------|
| Cu                             | 8.96                        | 63.546    |                                                                                        |          |
| Sb                             | 6.697                       | 121.76    |                                                                                        |          |
| S                              | 2.07                        | 32.066    |                                                                                        |          |
| Cu <sub>2</sub> S              | 5.6                         | 159.158   | $2\text{Cu} + \text{S}(\text{g}) \rightarrow \text{Cu}_2\text{S}$                      | 2.00     |
| CuS                            | 4.76                        | 95.611    | $\text{Cu} + \text{S}(\text{g}) \rightarrow \text{CuS}$                                | 2.83     |
| Sb <sub>2</sub> S <sub>3</sub> | 4.562                       | 339.715   | $2\text{Sb} + 3\text{S}(\text{g}) \rightarrow \text{Sb}_2\text{S}_3$                   | 2.05     |
| CuSbS <sub>2</sub>             | 4.87                        | 249.43    | $2\text{CuS} + \text{Sb}_2\text{S}_3 \rightarrow 2\text{CuSbS}_2 + \text{S}(\text{g})$ | 0.89     |
|                                |                             |           | $2\text{Cu} + \text{Sb}_2\text{S}_3 \rightarrow 2\text{CuSbS}_2$                       | 1.16     |
|                                |                             |           | $\text{Cu}_2\text{S} + \text{Sb}_2\text{S}_3 \rightarrow 2\text{CuSbS}_2$              | 1        |

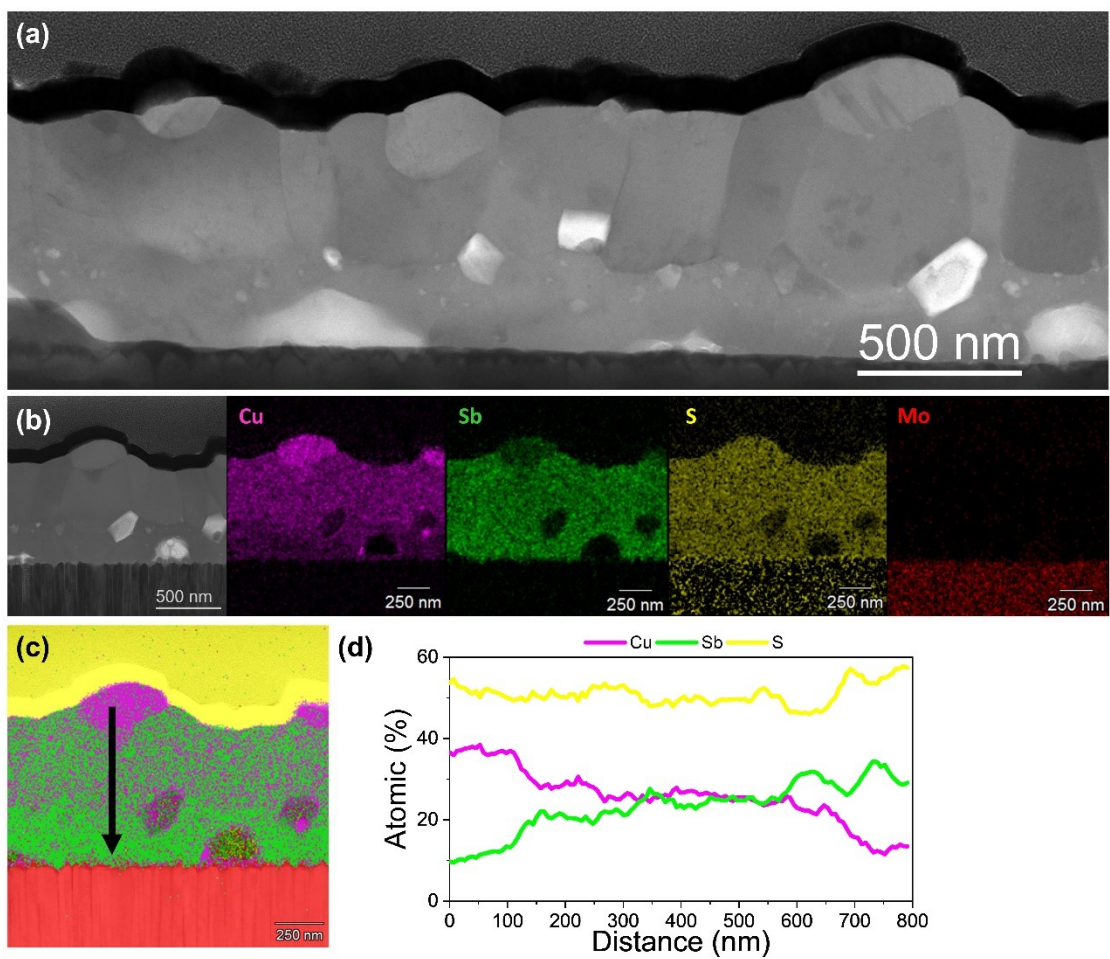

Fig S5 Microscopy analysis of Cu-Sb precursor after sulfurization treatment at 380 °C followed by rapid cooling, (a) cross-section TEM image, (b) STEM-EDS mapping, (c) phases mapping, (d) STEM-EDS line scan as arrow marked in (c).



Table S3 Composition changes of CuSbS<sub>2</sub> thin films subjected to different sulfurization treatments measured by ICP.

| <b>Sample ID</b>   | <b>Cu/Sb</b> | <b>Sb loss (%)</b> |
|--------------------|--------------|--------------------|
| <b>precursor</b>   | 0.889        | N/A                |
| <b>350 °C</b>      | 0.896        | 0.713              |
| <b>380 °C</b>      | 0.904        | 1.630              |
| <b>380 °C-3min</b> | 0.906        | 1.796              |
